# Supplementary material for: Structural and functional characterization explains loss of dNTPase activity of the cancer-specific R366C/H mutant SAMHD1 proteins
Source: PubMed Central journal article supplement (PMC8497992; doi:10.1016/j.jbc.2021.101170), 2021-09-04
Supplement: mmc1.pdf [file mmc1.pdf]

**a**

| Condition | %GFP Positive Cells |
|-----------|---------------------|
| WT        | 28.72%              |
| Empty     | 25.24%              |
| R145Q     | 29.84%              |
| Y155C     | 38.16%              |
| P158S     | 35.66%              |
| I201N     | 42.69%              |
| R366C     | 37.47%              |
| R366H     | 21.81%              |

**b**

| Condition | %mCherry Positive Cells |
|-----------|-------------------------|
| WT        | 69.2%                   |
| Empty     | 86.4%                   |
| L244F     | 68.9%                   |
| R451C     | 93.6%                   |
| F578V     | 72.2%                   |

**Supporting Table 1: Transfection efficiency of SAMHD1 cancer mutants.** 293T cells were transfected with SAMHD1 plasmids and a GFP plasmid (left) or an mCherry labelled SAMHD1 plasmid (right). Half of the sample was fixed and analyzed for GFP or mCherry using flow cytometry to determine transfection efficiency.

|                                                            | <b>R366C</b>                           | <b>R366H</b>                            |
|------------------------------------------------------------|----------------------------------------|-----------------------------------------|
| Data collection                                            |                                        |                                         |
| Wavelength (Å)                                             | 0.97918                                | 0.97918                                 |
| Space group                                                | P2 <sub>1</sub>                        | P2 <sub>1</sub>                         |
| Cell dimensions<br>a, b, c (Å)<br>α, β, γ (°)              | 80.9, 140.1, 97.2<br>90.0, 114.2, 90.0 | 83.7, 573.5, 100.5<br>90.0, 114.7, 90.0 |
| No. molecules/asymmetric unit                              | 4                                      | 16                                      |
| Resolution (Å)                                             | 50.0-1.9 (1.93-1.90)                   | 50.0-3.60 (3.66-3.60)                   |
| R <sub>merge</sub>                                         | 0.071 (>1)                             | 0.143 (>1)                              |
| Mean I / σI                                                | 17.3 (1.0)                             | 13.8 (1.6)                              |
| CC <sub>1/2</sub>                                          | 0.999 (0.297)                          | 0.996 (0.690)                           |
| Completeness (%)                                           | 99.1 (98.8)                            | 85.6 (83.1)                             |
| Redundancy                                                 | 3.3 (3.3)                              | 5.1 (4.8)                               |
| Unique reflections                                         | 153,730 (7,622)                        | 84,897 (4,131)                          |
| Refinement                                                 |                                        |                                         |
| No. nonhydrogen atoms                                      | 16,683                                 | 64,032                                  |
| R <sub>work</sub> /R <sub>free</sub>                       | 0.173/0.207                            | 0.227/0.259                             |
| Mean B-factor (Å <sup>2</sup> )                            | 31                                     | 144                                     |
| R.m.s.d.<br>Bond lengths (Å)<br>Bond angles (°)            | 0.012<br>1.7                           | 0.008<br>1.4                            |
| Ramachandran<br>Favored (%)<br>Allowed (%)<br>Outliers (%) | 98.64<br>1.26<br>0.10                  | 97.84<br>2.11<br>0.05                   |

**Supporting Table 2: Crystal Structure data collection and refinement statistics.**

**a**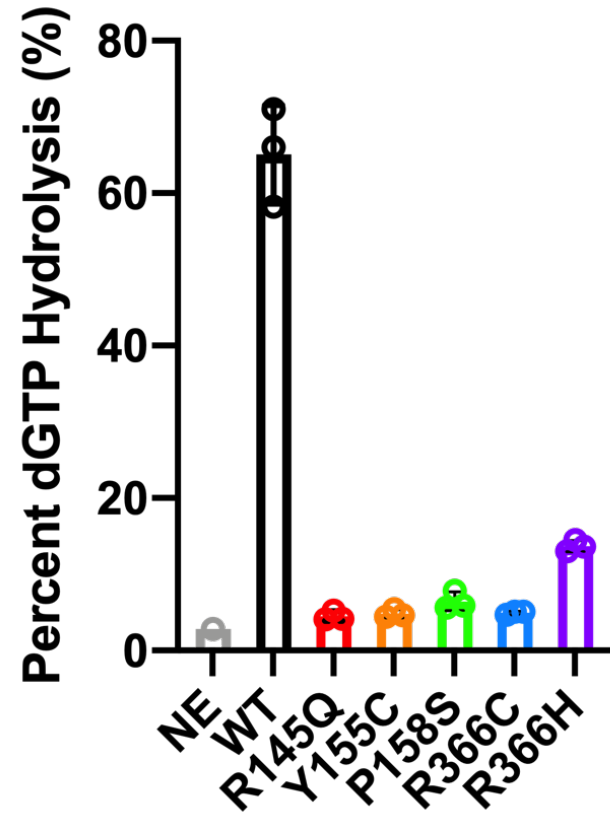

**Supporting Figure 1: Percent dGTP hydrolysis of SAMHD1 mutants.** Wild type and mutant SAMHD1 were incubated with  $\alpha^{32}\text{P}$ -dGTP in the presence of excess unlabeled dGTP. Reaction substrate and product were separated using TLC (Figure 3A). Densitometry analysis of the TLC plate was performed and percent dGTP hydrolysis was calculated by dividing the triphosphate product by the lane total.

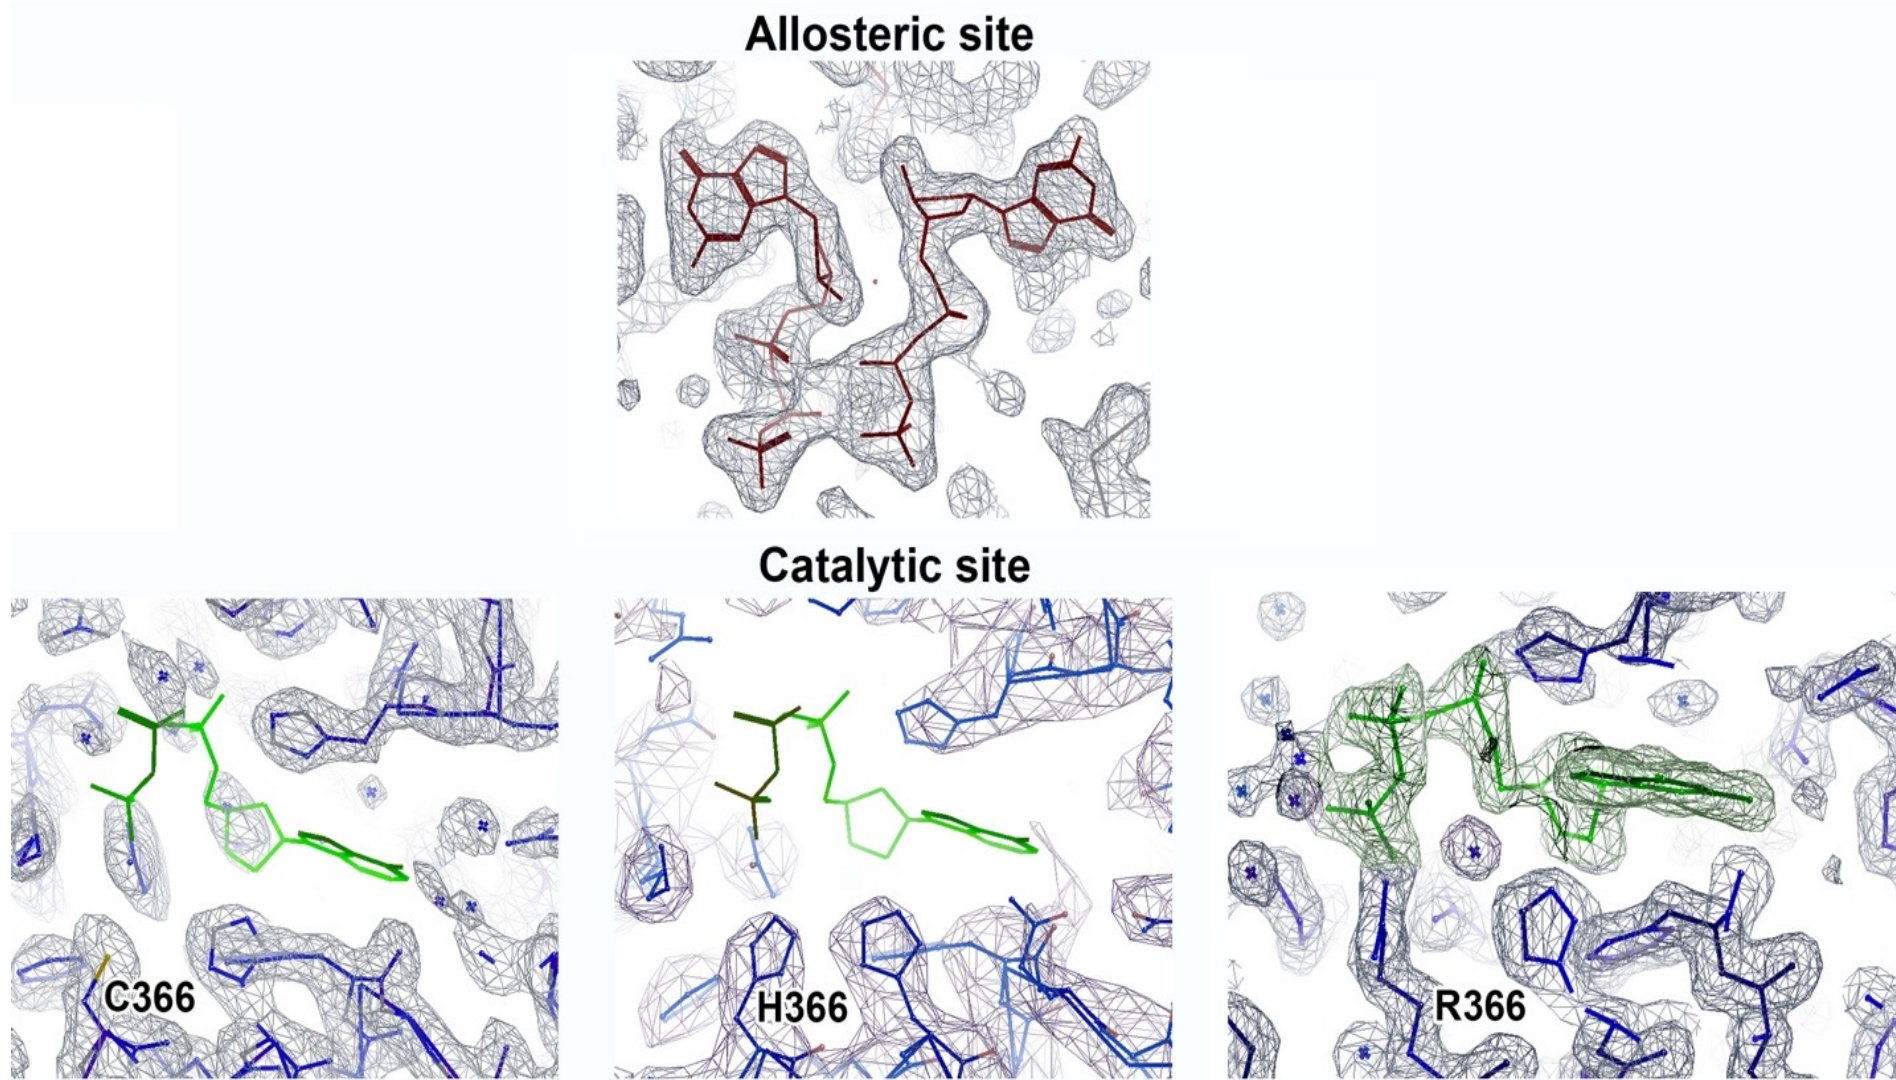

**Supporting Figure 2: Electron density in the allosteric and catalytic sites of R366C/H.** 2Fo-Fc electron density (1 $\sigma$  level, gray mesh) of the regions around the allosteric nucleotides of the R366C structure (top) and the catalytic site of the R366C (bottom left), the R366H (bottom middle, sharpened by a B-factor of -80  $\text{\AA}^2$ ), and the SAMHD1<sub>HD/RN</sub> (bottom right, PDB 4BZB) structures. There is a lack of nucleotide density in the catalytic site of the R366C/H mutant structures, where the nucleotide substrate (green) was modeled in based on its position in the SAMHD1<sub>HD/RN</sub> structure.

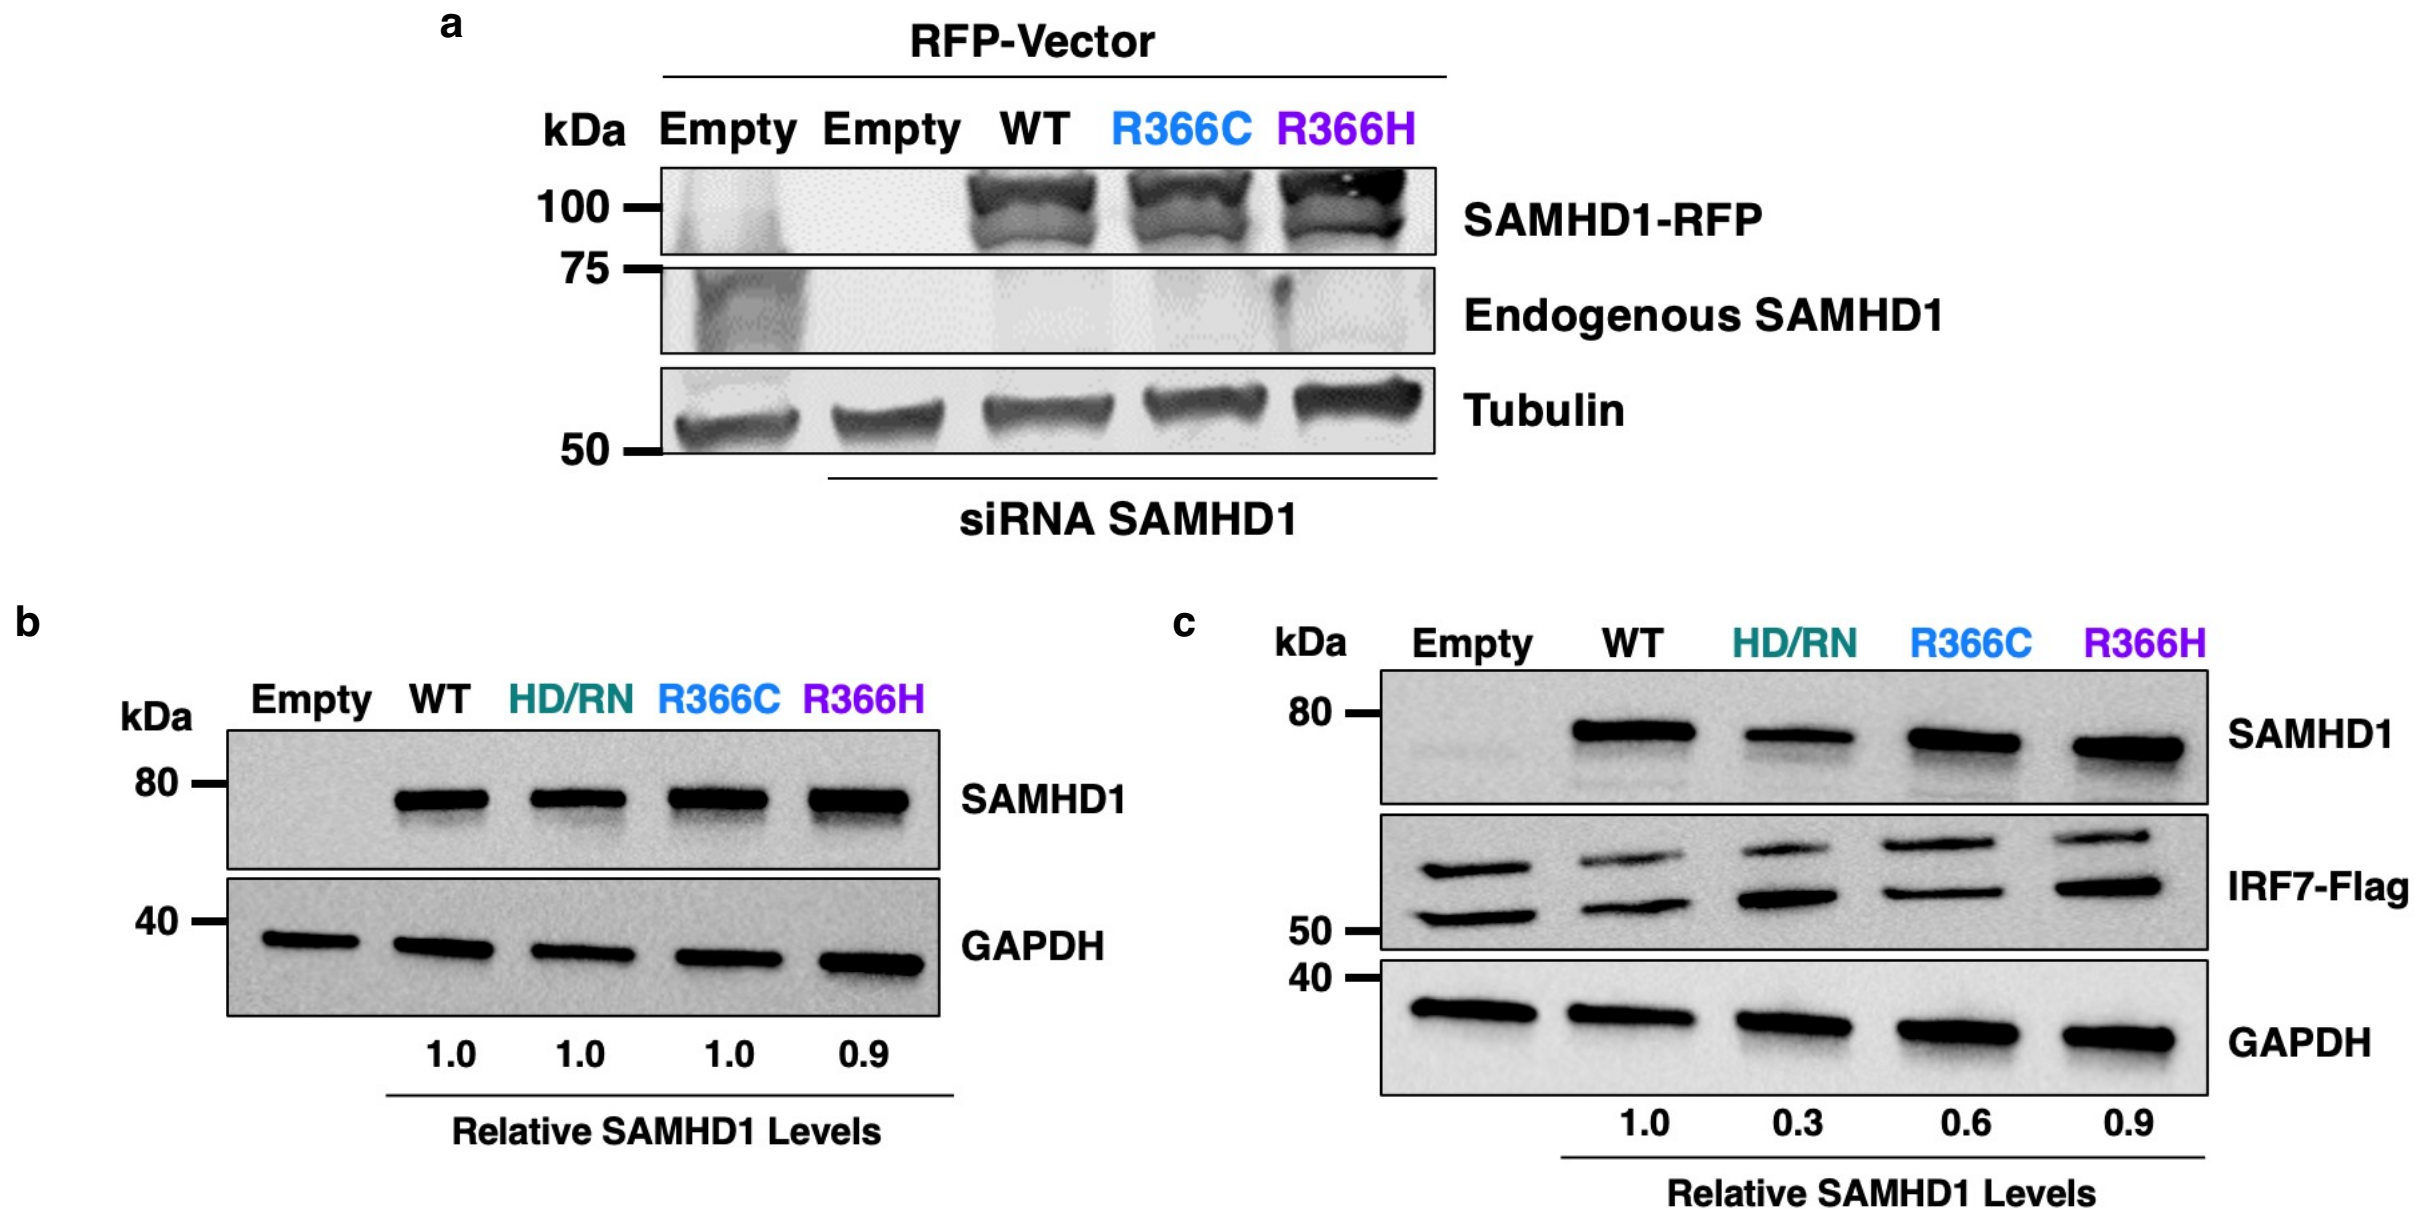

**Supporting Figure 3: Immunoblot for SAMHD1 expression levels.** **a.** dsDNA repair by Homologous Recombination **b.** LTR-Luciferase assay **c.** ISRE-Luciferase assay. Expression levels of SAMHD1 were used to normalize activity data in Figure 6.
